# Supplementary figures and images for: Epidemiology of sepsis in Korea: a population-based study of incidence, mortality, cost and risk factors for death in sepsis
Source: PubMed Central journal article supplement — Clin Exp Emerg Med. 2019 Feb 20;6(1):49–63. doi: 10.15441/ceem.18.007 (PMC6453691; doi:10.15441/ceem.18.007), 2019-02-20

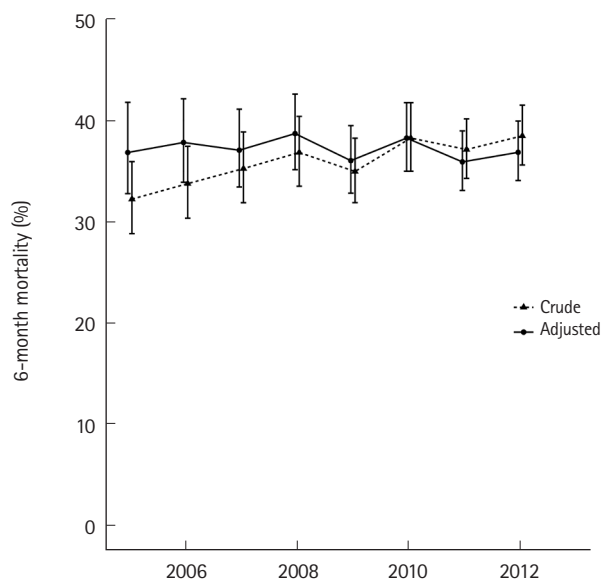

**Supplementary Fig. 1.** Eight-year trend of sepsis mortality in patients with septic shock.

Supplement: ceem-18-007-suppl.pdf [file ceem-18-007-suppl.pdf]
